# Supplementary material for: Overcoming passivation through improved mass transport in dense ionic fluids
Source: Royal Society of Chemistry journal article supplement (doi:10.1039/d4fd00030g), 2024-01-01

### Overcoming passivation through improved mass transport in dense ionic fluids

Evangelia Daskalopoulou, Philip Hunt, Christopher E. Elgar, Minjun Yang, Andrew P. Abbott, Jennifer M. Hartley\*

School of Chemistry, University of Leicester, LE1 7RH, UK

\* jmh84@le.ac.uk

#### Supplementary Information

| <b>Table S1:</b> Source, purity, and diameter of the metal wires used to form the working electrodes and pseudo reference electrodes. |                 |                |                      |
|---------------------------------------------------------------------------------------------------------------------------------------|-----------------|----------------|----------------------|
| <b>Metal Wire</b>                                                                                                                     | <b>Purity</b>   | <b>Source</b>  | <b>Diameter (mm)</b> |
| Copper                                                                                                                                | 99.00%          | RS             | 1.25                 |
| Nickel                                                                                                                                | 98.00%          | VWR            | 1.00                 |
| Cobalt                                                                                                                                | 99.995%         | Alfa-Aesar     | 1.00                 |
| Silver                                                                                                                                | 99.90%          | Alfa-Aesar     | 0.50                 |
| Aluminium                                                                                                                             | >98.00%         | Unicorn Metals | 3.00                 |
| Titanium                                                                                                                              | Grade 5 >98.00% | Unicorn Metals | 3.00                 |

| <b>Table S2:</b> Literature values for viscosity and conductivity of the three choline chloride systems investigated. |                                                                |                                    |                          |                                          |                   |
|-----------------------------------------------------------------------------------------------------------------------|----------------------------------------------------------------|------------------------------------|--------------------------|------------------------------------------|-------------------|
| <b>Solvent</b>                                                                                                        | <b>[Cl<sup>-</sup>] / mol kg<sup>-1</sup> of total solvent</b> | <b>Density / g cm<sup>-3</sup></b> | <b>Viscosity / mPa s</b> | <b>Conductivity / mS cm<sup>-1</sup></b> | <b>Literature</b> |
| ChCl:2EG                                                                                                              | 3.79                                                           | 1.12                               | 37                       | 7.61                                     | lit *             |
| 1:3 Brine                                                                                                             | 5.16                                                           | 1.097(4)                           | 14.08(6)                 | 43.3(3)                                  | lit **            |
| 1:6.85 Brine                                                                                                          | 3.79                                                           | 1.057(5)                           | 4.19(9)                  | 83.1(6)                                  | this work         |

\* Data taken from T. Isono, *J. Chem. Eng. Data*, 1984, **29**, 45-52  
\*\* Data taken from G. Zante et al, *Angew. Chem. Int. Ed. Eng.*, 2023, **62**, e202311140

**Table S3:** Table showing the parameters used for calculation of the copper(I) concentration at the solvent-electrode interface at the point of passivation for three different ChCl systems.  $E_{ox}$  is the onset potential of copper oxidation,  $E_{pass}$  is the potential at which the peak current is observed under silent conditions and  $[Cu^+]_{x=0}$  is the concentration of Cu(I) at the electrode interface prior to the onset of electrode passivation.

| ChCl:2EG, $[Cl^-] = 4.25 \text{ mol dm}^{-3}$                                                                                                               |                                            |                                                  |                       |                                     |                                     |
|-------------------------------------------------------------------------------------------------------------------------------------------------------------|--------------------------------------------|--------------------------------------------------|-----------------------|-------------------------------------|-------------------------------------|
| Voltage scan rate / $V \text{ s}^{-1}$                                                                                                                      | $D(Cu^+) / \text{m}^2 \text{ s}^{-1}$<br>* | Peak anodic current density / $A \text{ m}^{-2}$ | $E_{ox}-E_{pass} / V$ | $[Cu^+]_{x=0} / \text{mol dm}^{-3}$ | $[Cu^+]_{x=0}:[Cl^-]_{\text{bulk}}$ |
| 0.01                                                                                                                                                        | $8.57 \times 10^{-12}$                     | 393                                              | 0.44                  | 4.61                                | 1.09                                |
| 0.05                                                                                                                                                        | $8.57 \times 10^{-12}$                     | 823                                              | 0.66                  | 5.29                                | 1.25                                |
| 0.1                                                                                                                                                         | $8.57 \times 10^{-12}$                     | 1172                                             | 0.76                  | 5.72                                | 1.35                                |
| 1:3 ChCl:water, $[Cl^-] = 5.70 \text{ mol dm}^{-3}$                                                                                                         |                                            |                                                  |                       |                                     |                                     |
| Scan rate / $V \text{ s}^{-1}$                                                                                                                              | $D(Cu^+) / \text{m}^2 \text{ s}^{-1}$<br>† | Peak anodic current density / $A \text{ m}^{-2}$ | $E_{ox}-E_{pass} / V$ | $[Cu^+]_{x=0} / \text{mol dm}^{-3}$ | $[Cu^+]_{x=0}:[Cl^-]_{\text{bulk}}$ |
| 0.01                                                                                                                                                        | $1.55 \times 10^{-11}$                     | 695                                              | 0.29                  | 4.94                                | 0.87                                |
| 0.05                                                                                                                                                        | $1.55 \times 10^{-11}$                     | 1308                                             | 0.42                  | 4.99                                | 0.88                                |
| 0.1                                                                                                                                                         | $1.55 \times 10^{-11}$                     | 1667                                             | 0.49                  | 4.86                                | 0.86                                |
| 1:6.85 ChCl:water, $[Cl^-] = 4.02 \text{ mol dm}^{-3}$                                                                                                      |                                            |                                                  |                       |                                     |                                     |
| Scan rate / $V \text{ s}^{-1}$                                                                                                                              | $D(Cu^+) / \text{m}^2 \text{ s}^{-1}$<br>‡ | Peak anodic current density / $A \text{ m}^{-2}$ | $E_{ox}-E_{pass} / V$ | $[Cu^+]_{x=0} / \text{mol dm}^{-3}$ | $[Cu^+]_{x=0}:[Cl^-]_{\text{bulk}}$ |
| 0.01                                                                                                                                                        | $1.09 \times 10^{-10}$                     | 940                                              | 0.22                  | 1.69                                | 0.42                                |
| 0.05                                                                                                                                                        | $1.09 \times 10^{-10}$                     | 1847                                             | 0.32                  | 1.79                                | 0.45                                |
| 0.1                                                                                                                                                         | $1.09 \times 10^{-10}$                     | 2412                                             | 0.39                  | 1.83                                | 0.46                                |
| * Diffusion coefficient from A. Y. M. Al-Murshedi, et al., <i>Trans. IMF</i> , 2019, <b>97</b> , 321-329                                                    |                                            |                                                  |                       |                                     |                                     |
| † Diffusion coefficient from G. Zante, et al., <i>Angew. Chem. Int. Ed. Eng.</i> , 2023, <b>62</b> , e202311140                                             |                                            |                                                  |                       |                                     |                                     |
| ‡ Diffusion coefficient estimated via interpolation of data reported in G. Zante, et al., <i>Angew. Chem. Int. Ed. Eng.</i> , 2023, <b>62</b> , e202311140. |                                            |                                                  |                       |                                     |                                     |

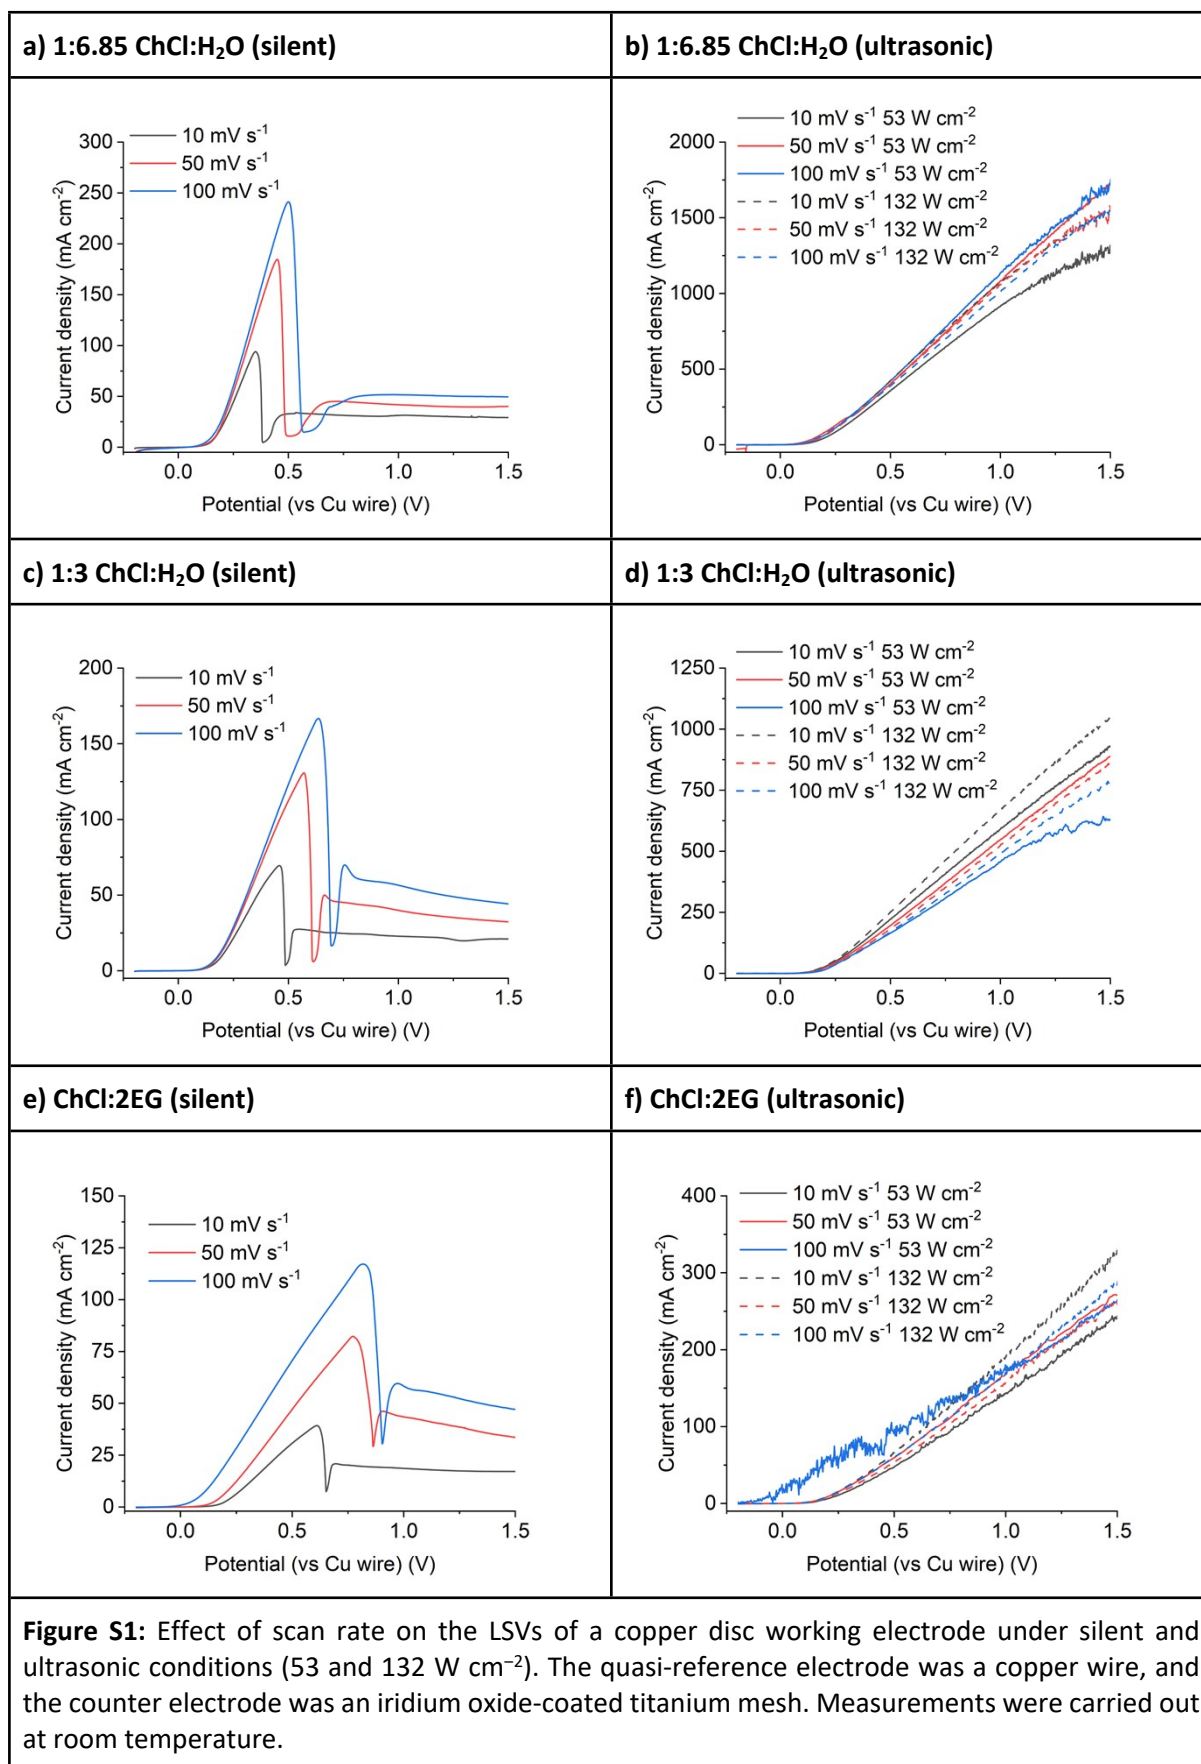

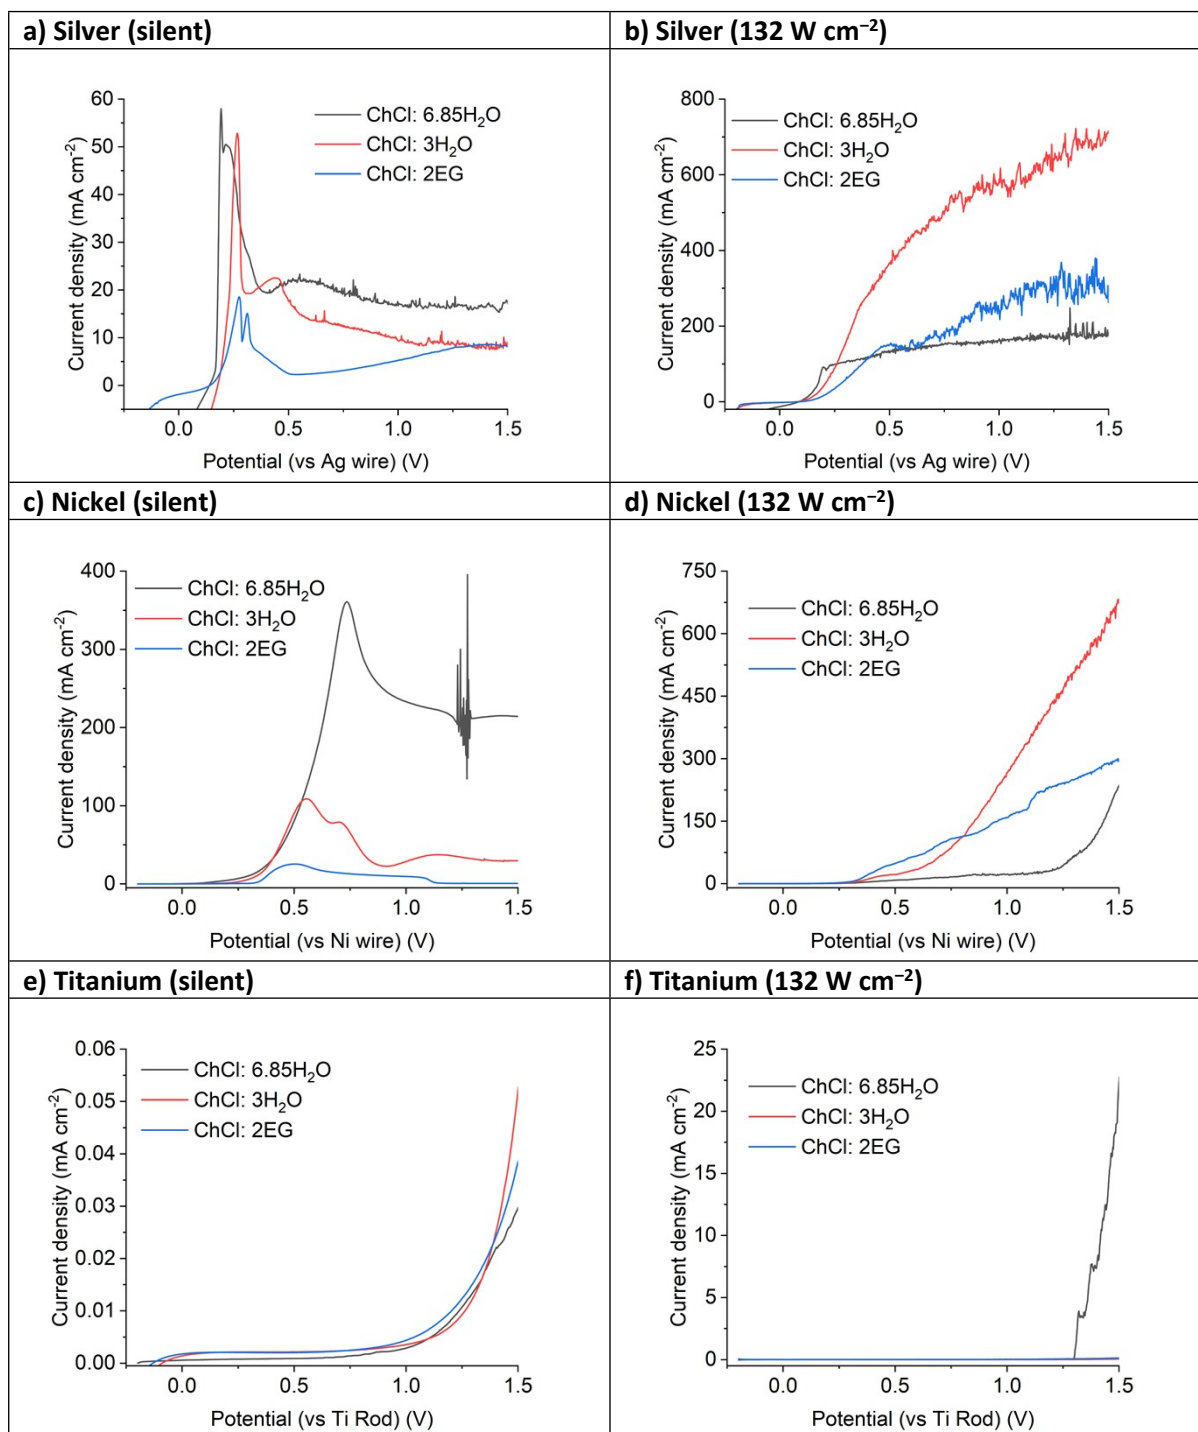

**Figure S2:** Linear sweep voltammograms of a, b) silver, c, d) nickel, and e, f) titanium disc working electrodes in ChCl:2EG and two different ChCl brines, under a, c, e) silent, and b, d, f) 132 W cm<sup>-2</sup>. The reference electrode was the same metal as the working electrode, and the scan rate was 10 mV s<sup>-1</sup>. First scans presented only.

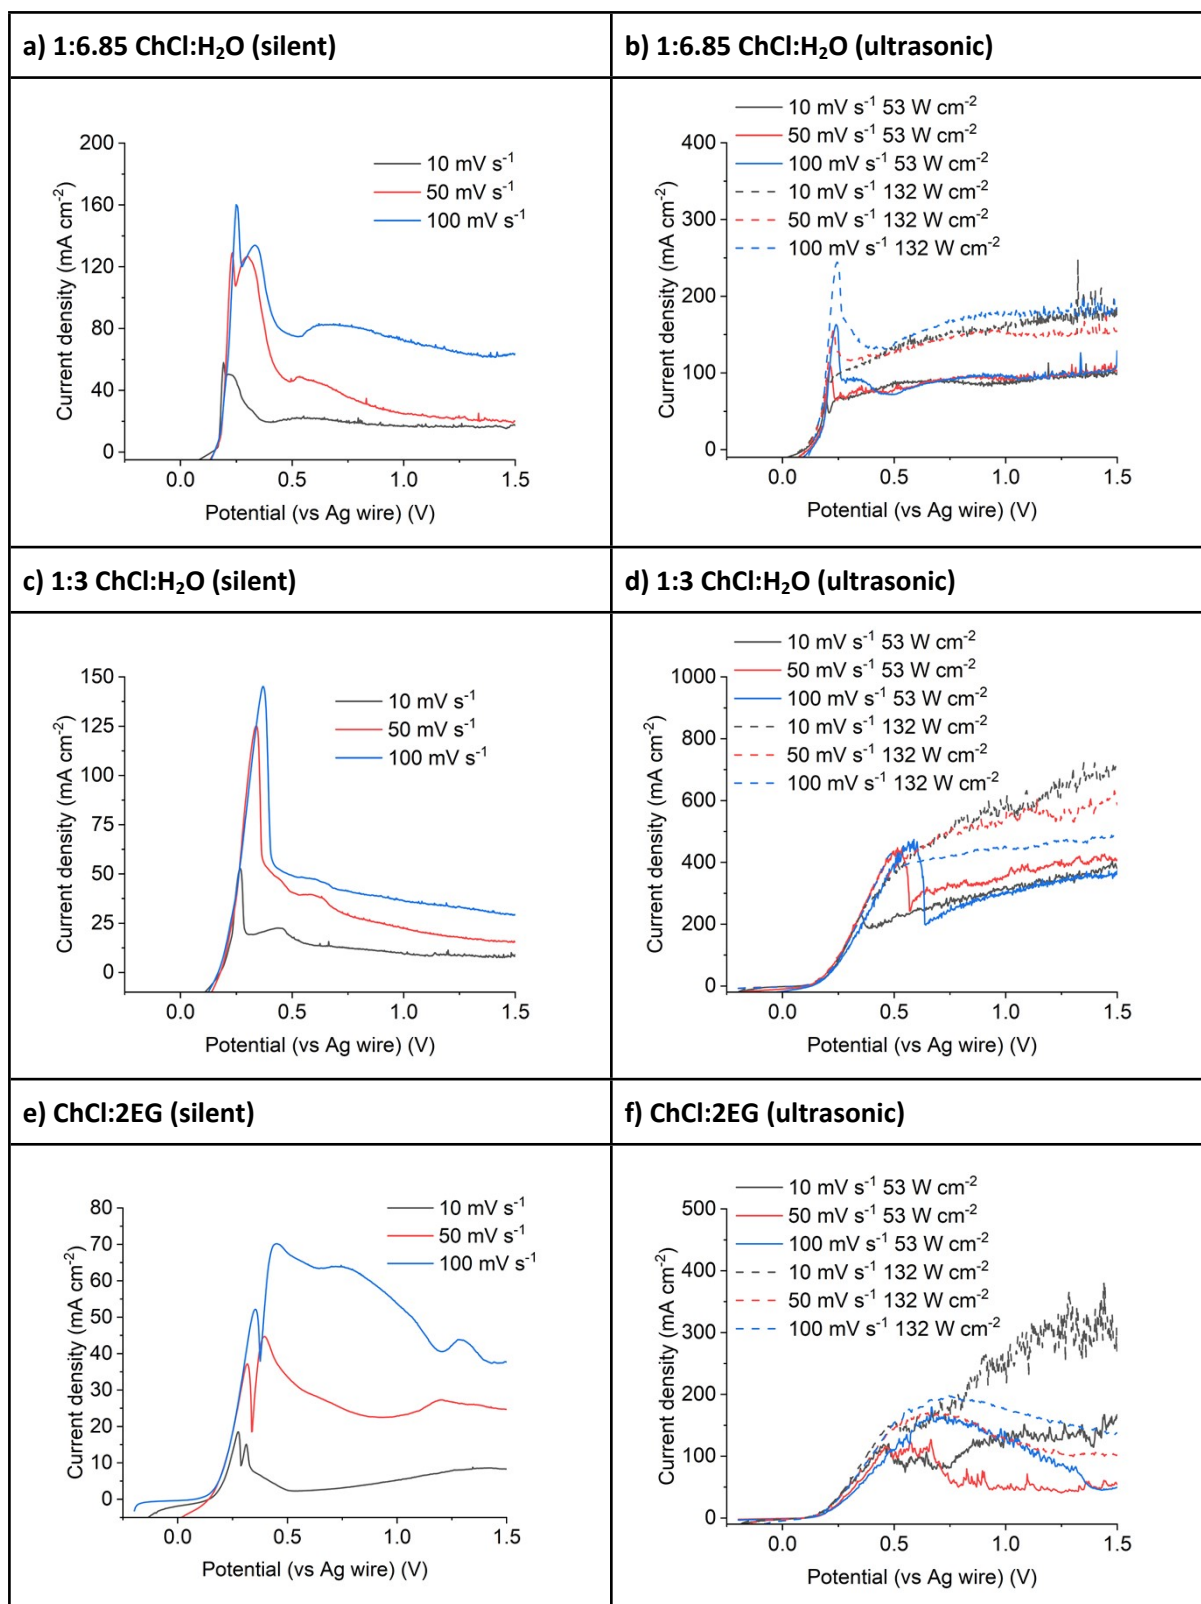

**Figure S3:** Effect of scan rate on the LSVs of a silver disc working electrode under silent and ultrasonic conditions ( $53$  and  $132 \text{ W cm}^{-2}$ ). The quasi-reference electrode was a silver wire, and the counter electrode was an iridium oxide-coated titanium mesh. Measurements were carried out at room temperature.

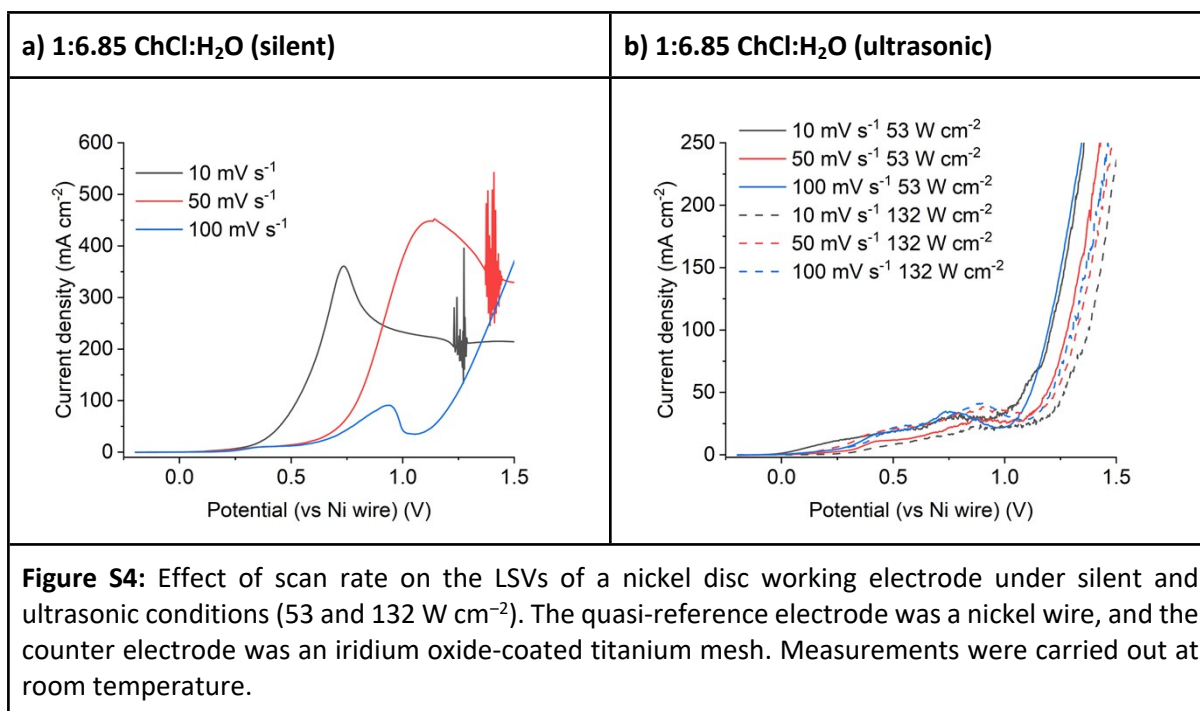

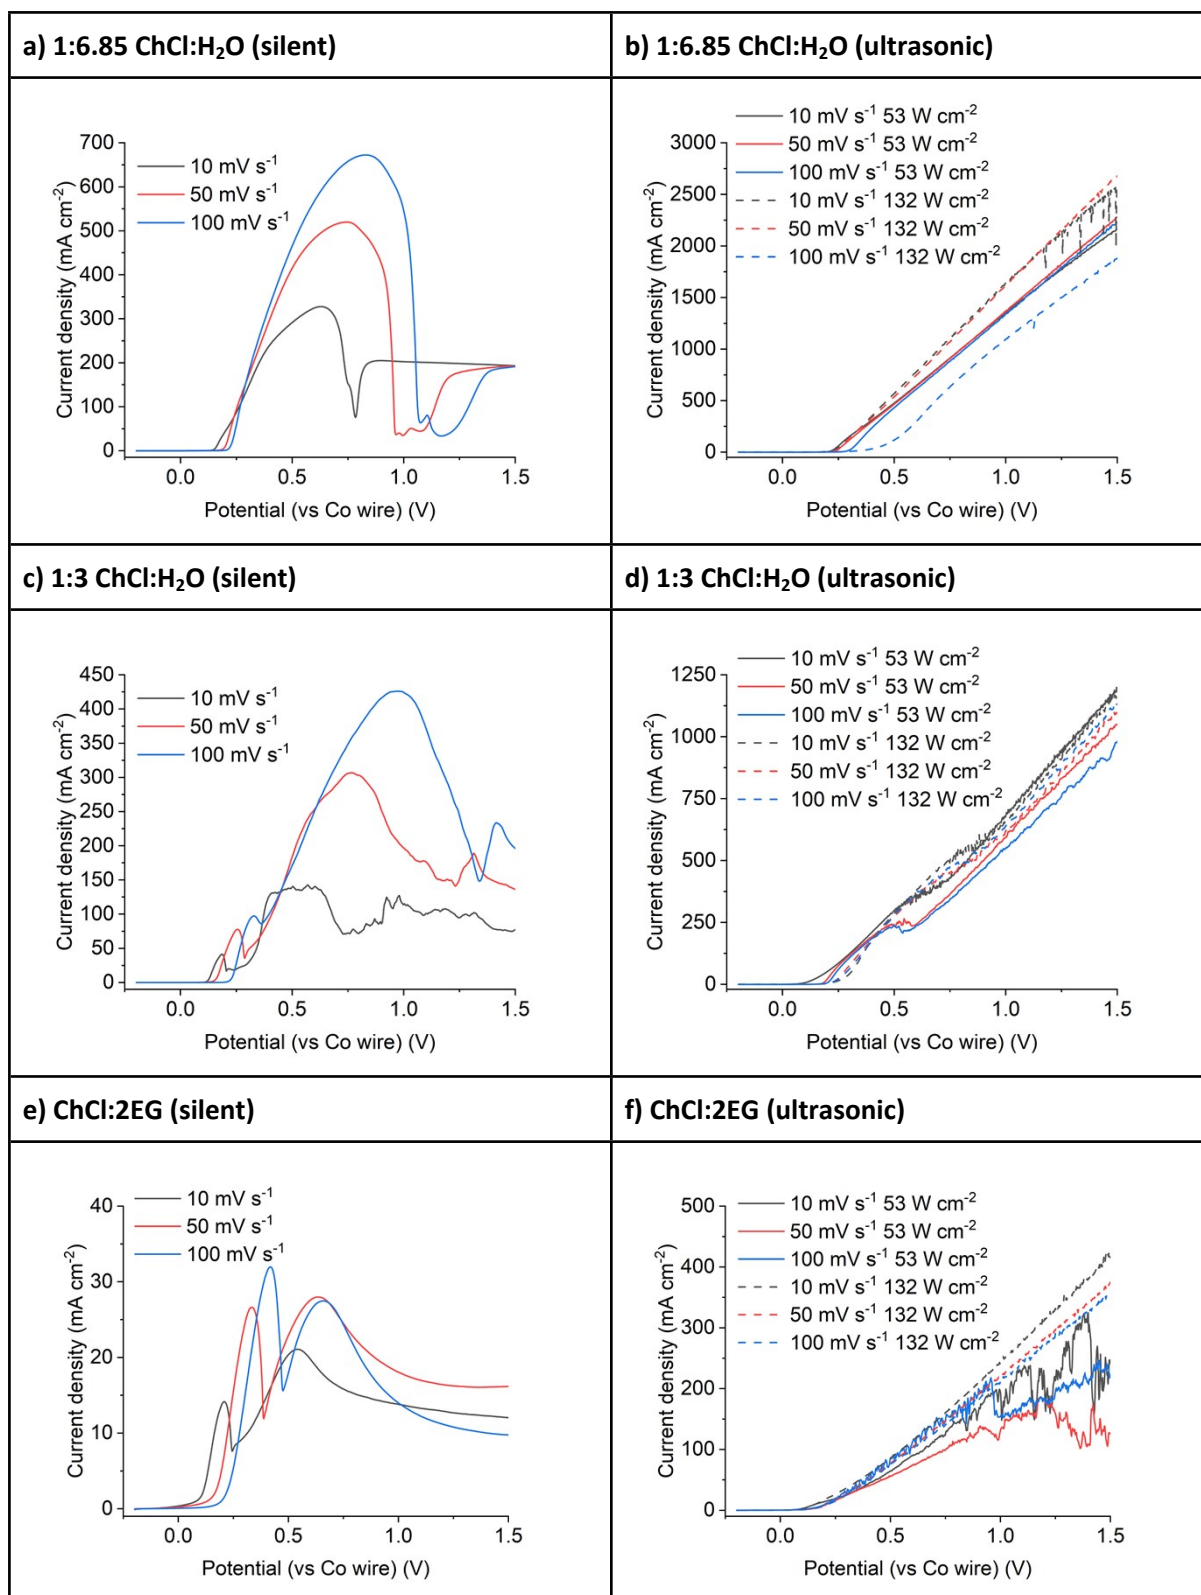

**Figure S5:** Effect of scan rate on the LSVs of a cobalt disc working electrode under silent and ultrasonic conditions (53 and 132 W cm<sup>-2</sup>). The quasi-reference electrode was a cobalt wire, and the counter electrode was an iridium oxide-coated titanium mesh. Measurements were carried out at room temperature.

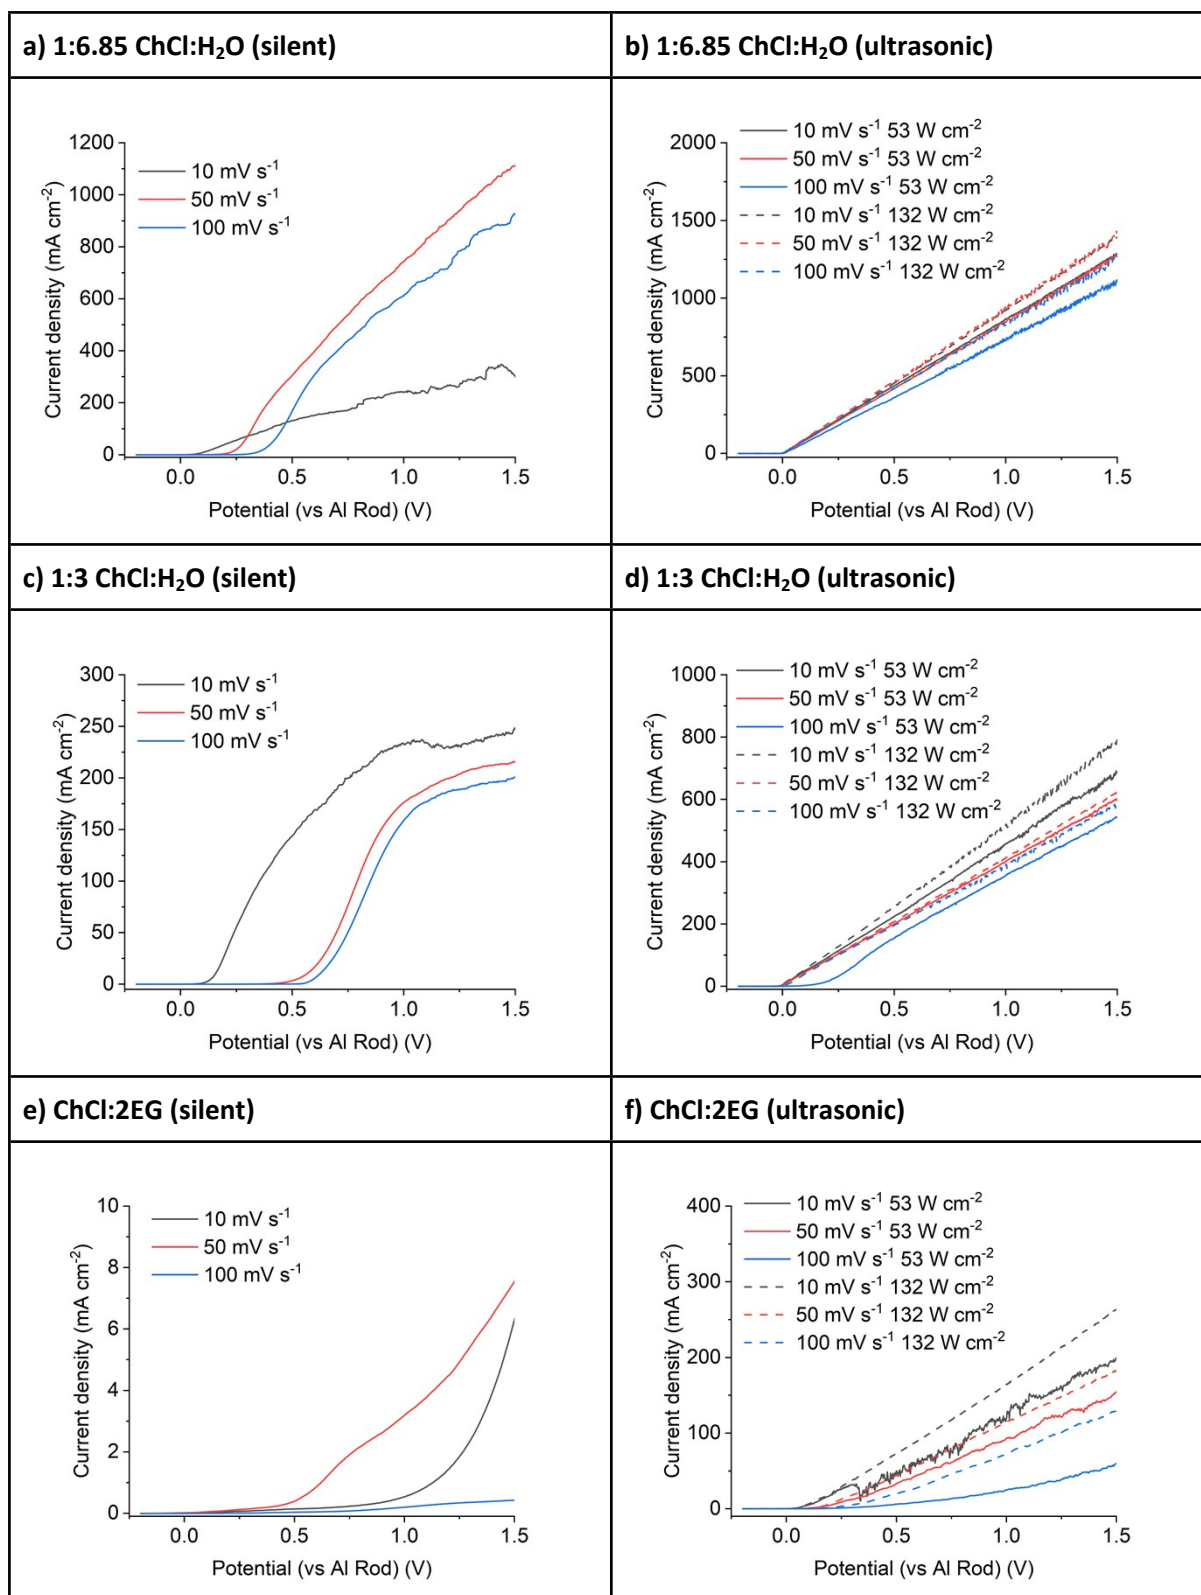

**Figure S6:** Effect of scan rate on the LSVs of an aluminium disc working electrode under silent and ultrasonic conditions (53 and 132 W cm<sup>-2</sup>). The quasi-reference electrode was an aluminium wire, and the counter electrode was an iridium oxide-coated titanium mesh. Measurements were carried out at room temperature.



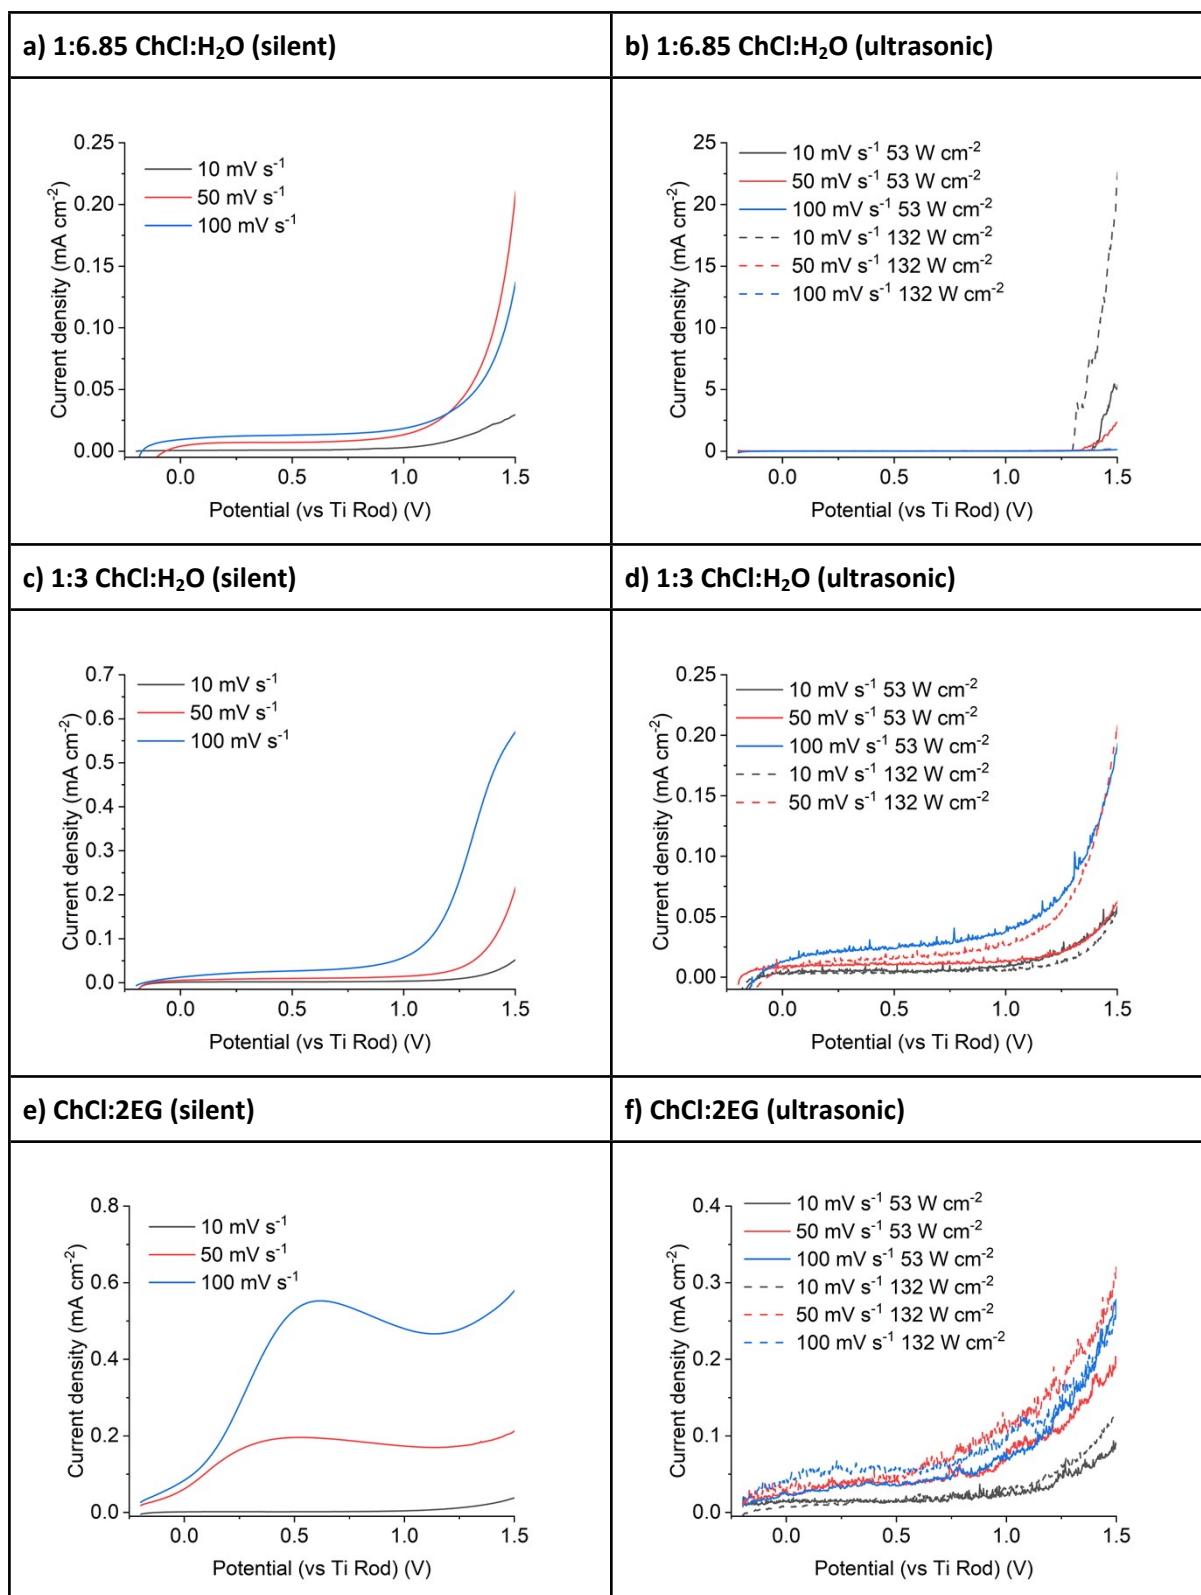

**Figure S7:** Effect of scan rate on the LSVs of a titanium disc working electrode under silent and ultrasonic conditions (53 and 132 W cm<sup>-2</sup>). The quasi-reference electrode was a titanium wire, and the counter electrode was an iridium oxide-coated titanium mesh. Measurements were carried out at room temperature.

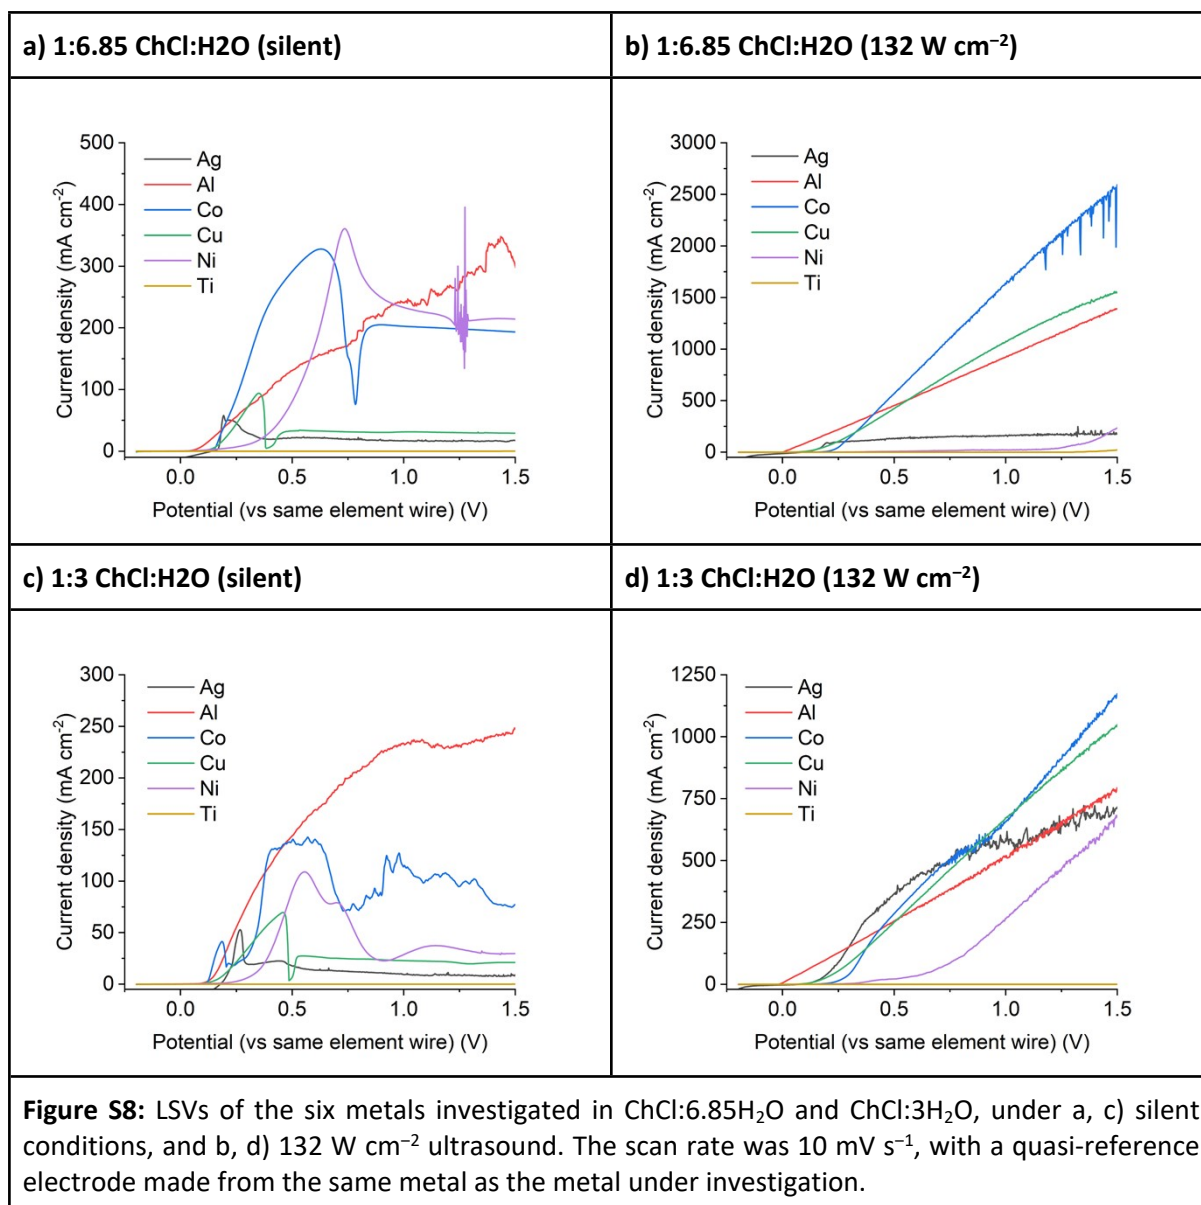

Supplement: d4fd00030g1.pdf [file d4fd00030g1.pdf]
